# Supplementary material for: Effects of Gold Nanorods on Imprinted Genes Expression in TM-4 Sertoli Cells
Source: PubMed Central journal article supplement (PMC4808934; doi:10.3390/ijerph13030271), 2016-03-01
Supplement: ijerph-13-00271-s001.pdf [file ijerph-13-00271-s001.pdf]

## Supplementary Materials: Effects of Gold Nanorods on Imprinted Genes Expression in TM-4 Sertoli Cells

Beilei Yuan, Hao Gu, Bo Xu, Qiuqin Tang, Wei Wu, Xiaoli Ji, Yankai Xia, Lingqing Hu, Daozhen Chen and Xinru Wang

**Table S1.** List of primers used to test the expression of the 44 imprinted genes and the reference genes Gapdh and U6.

| Gene             | Primer-F (5'-3')                 | Primer-R (5'-3')                            |
|------------------|----------------------------------|---------------------------------------------|
| <i>Ano1</i>      | CTGATGCCGAGTGCAAGTATG            | AGGGCCTCTTGTGATGGTACA                       |
| <i>Cdkn1c</i>    | CCCATCTAGCTTGCAGTCTCTT           | CAGACGGCTCAGGAACCATT                        |
| <i>Ddc</i>       | TGGGGACCACAACATGCTG              | TCAGGGCAGATGAATGCACTG                       |
| <i>Dlk1</i>      | AGCTGCACCCCAACC                  | CTGCTGGCGCAGTTGGTC                          |
| <i>Gnas</i>      | TGCAAGGAGCAACAGCGAT              | GCGGCCACAATGGTTTCAAT                        |
| <i>Gpr1</i>      | GCTGGGAGTTGTTCAGTGGG             | GACGATGGCATTTCCTGGAAT                       |
| <i>Grb10</i>     | AACCCAGCTTTTGCAGGAA              | TCAGGGAGAAGATGTTGCTGT                       |
| <i>Gtl2</i>      | GTTTCTGGACTGTGGGCTGT             | CAACAGCAACAAAACCTCAGAACATTCA                |
| <i>H19</i>       | GCACCTTGGACATCTGGAGT             | TTCTTTCCAGCCCTAGCTCA                        |
| <i>Hymai</i>     | TGCCTTTCAGTGTGAACCA              | TGCATCCCTAAACAACAGCTT                       |
| <i>Igf2</i>      | AGCCGTGGCATCGTTGAG               | GACTGCTTCCAGGTGTCATATTG                     |
| <i>Igf2as</i>    | TCTTTGCCCTCTTTCGTCTC             | CTCCAGGTGCTTCCGTCTAG                        |
| <i>Igf2r</i>     | CTGCCGCTATGAAATTGAGTGG           | CGCCGCTCAGAGAACAAGTT                        |
| <i>Inpp5f V2</i> | ACTGAACCTGAGCAGATTTC             | CCACCCCACTCCAAAAGGTT                        |
| <i>Kcnk9</i>     | GATGAAACGCCGGAAGTC               | GTGTTCCGGCTTTGGCAGT                         |
| <i>Kcnq1</i>     | GCGTCTCCATCTACAGCACG             | GAAGTGGTAAACGAAGCATTTC                      |
| <i>Klf14</i>     | TTTCCCTCACACTTGATTACCC           | AGCGAGGGAGGGACTAAGAT                        |
| <i>Magel2</i>    | GGGCTCCGCTAAATCATTG              | CCCCTGCGGTCTATAGAAGA                        |
| <i>Magi2</i>     | GGACTAGCAGGTTACGAA               | GCTCCGACGTACGGAAACT                         |
| <i>Mest</i>      | TGACCACATTAGCCACTATCCA           | CCTGCTGGCTTCTCCTATAACA                      |
| <i>Mir296</i>    | ACACTCCAGCTGGGAGGGCCCCCTCAA      | CTCAACTGGTGTCTGAGTTCGGCAATTCAGTTGAGACAGGATT |
| <i>Mir298</i>    | ACACTCCAGCTGGGAGCAGAAGCAGGGAGGTT | CTCAACTGGTGTCTGAGTTCGGCAATTCAGTTGAGTGGGAGAA |

Table S1. Cont.

| Gene            | Primer-F (5'-3')            | Primer-R (5'-3')               |
|-----------------|-----------------------------|--------------------------------|
| <i>Mkrn3</i>    | GACCTTCCCGTCTGTGAGC         | ATGTGGCAGGGCTGAATCT            |
| <i>Nap1l5</i>   | TTATCGAGAGCCTGCCTAATTCG     | GCTTCTATCTTATCGCATCGCTT        |
| <i>Ndn</i>      | CTGATGATGTGTGTTGGGGTA       | GGCTTTGCTGGTGACTTCTT           |
| <i>Nespas</i>   | ACTGAACCTGAGCAGATTTCGA      | CCACCCCACTCCAAAAGGTT           |
| <i>Nnat</i>     | GTACATCTTCCGCGTGCTG         | CTTCTCGCAATGGGCTGT             |
| <i>Ntm</i>      | CTCGCGTGGTCCTTCTGAG         | TCTTTGGGTGGTTGTCTGTCT          |
| <i>Peg10</i>    | AAATTGCCTGACATGAAGAGGAGTCTA | AAGCCTAGTCACCACTTCAAACACACTAAA |
| <i>Peg3</i>     | ACATTTCTGGTGTGTTGAGGAGTT    | AGACCAGGTTCCGGTAATTCT          |
| <i>Phlda2</i>   | TCCATCCTCAAGGTGGACTG        | ATCTCCTTGTGGTCCGGTGGT          |
| <i>Plagl1</i>   | CATATTTGCATGTTAGAAGAATCAGC  | TGAGTCAGTTAGGTCAGTGTAGAGAGA    |
| <i>Ppp1r9a</i>  | TGTACGATGGCCCTTCATATTCC     | AGCGGTTGTTCTGTCTGATT           |
| <i>Pwcr1</i>    | TGCTCTTTAGCAGGATGGTGT       | GATGCAGGGATGCTCGTC             |
| <i>Rian</i>     | TCCAGTACCTGTTGCCACA         | GGTAATGAGGTCCGGAAGC            |
| <i>Sgce</i>     | ATGGAGTTTCGCTCCTGTTG        | GAGTCTGATGTGGCAAGTCC           |
| <i>Slc22a18</i> | CCTCAGCTTCACCTGCATCC        | GTGTACCTGGCGGGGCTTAC           |
| <i>Slc22a2</i>  | GGGTCACTCTTCCTCATGCC        | GCAGTAAGCCCTCTCCTTGG           |
| <i>Slc22a3</i>  | GAGCGCTTGTTCTGGTCTCA        | TGCAGCTATCACACAAGCCA           |
| <i>Snrpn</i>    | GAGGAGTTGGGGGACCAT          | CAGCTGCTACAGTGCCTCTTC          |
| <i>Snurf</i>    | TCTGATTCCAAGCAAAAACCA       | GTTCTCCTAGAAACAATGCAAGC        |
| <i>Tfpi2</i>    | CTGGGGCTGTTCGATTCTGC        | TCTCCGCGTTATTTCTCTGTTG         |
| <i>Ube3a</i>    | CGAATGGCCACAGCTTGTA         | GCTTCATTCCGGCTAGCTTCA          |
| <i>Zim2</i>     | TGCAAGGATTGTGGTAAGTCC       | AGCTGCTGCTGCTTCATCTT           |
| <i>Gapdh</i>    | GCACCGTCAAGGCTGAGAAC        | GGATCTCGCTCCTGGAAGATG          |
| <i>U6</i>       | CTCGCTTCGGCAGCACA           | AACGCTTCACGAATTTGCGT           |
| URP             | TGGTGTCGTGGAGTCG            |                                |

**Table S2.** List of 44 homologous imprinted genes.

| Gene             | Location      |                | Full Name                                                                  | Gene Type | Expressed Allele |
|------------------|---------------|----------------|----------------------------------------------------------------------------|-----------|------------------|
|                  | Mouse         | Human          |                                                                            |           |                  |
| <i>Ano1</i>      | 7 AS          | 11q13.3        | anoctamin 1, calcium activated chloride channel                            | PC        | M                |
| <i>Cdkn1c</i>    | 7 69.49 cM AS | 11p15.5 AS     | cyclin-dependent kinase inhibitor 1C (P57)                                 | PC        | M                |
| <i>Ddc</i>       | 11 7.0 cM AS  | 7p12.2 AS      | dopa decarboxylase                                                         | PC        | P                |
| <i>Dlk1</i>      | 12 54.0 cM    | 14q32          | delta-like 1 homolog (Drosophila)                                          | PC        | P                |
| <i>Gnas</i>      | 2 104.0 cM    | 20q13.3        | GNAS (guanine nucleotide binding protein, alpha stimulating) complex locus | PC        | ID               |
| <i>Gpr1</i>      | 1 AS          | 2q33.3 AS      | G protein-coupled receptor 1                                               | PC        | P                |
| <i>Grb10</i>     | 11 8.0 cM AS  | 7p12-p11.2 AS  | growth factor receptor bound protein 10                                    | PC        | ID               |
| <i>Gtl2</i>      | 12 54.0 cM    | 14q32          | gene trap locus 2                                                          | NC        | M                |
| <i>H19</i>       | 7 69.03 cM AS | 11p15.5 AS     | H19, imprinted maternally expressed transcript                             | NC        | M                |
| <i>Hymai</i>     | 10            | 6q24.2 AS      | hydatidiform mole associated and imprinted transcript                      | NC        | P                |
| <i>Igf2</i>      | 7 69.09 cM AS | 11p15.5 AS     | insulin-like growth factor 2                                               | PC        | P                |
| <i>Igf2as</i>    | 7 69.09 cM    | 11p15.5        | insulin-like growth factor 2, antisense                                    | NC        | P                |
| <i>Igf2r</i>     | 17 7.35 cM AS | 6q26           | insulin-like growth factor 2 receptor                                      | PC        | M                |
| <i>Inpp5f V2</i> | 7 F3          | 10q26.11       | inositol polyphosphate-5-phosphatase F                                     | PC        | P                |
| <i>Kcnk9</i>     | 15 D3 AS      | 8q24.3 AS      | potassium channel, subfamily K, member 9                                   | PC        | M                |
| <i>Kcnq1</i>     | 7 69.3 cM     | 11p15.5        | potassium voltage-gated channel, subfamily Q, member 1                     | PC        | M                |
| <i>Klf14</i>     | 6 A3.3 AS     | 7q32.3 AS      | Kruppel-like factor 14                                                     | PC        | M                |
| <i>Magel2</i>    | 7 28.0 cM     | 15q11-q12 AS   | melanoma antigen, family L, 2                                              | PC        | P                |
| <i>Magi2</i>     | 5             | 7q21 AS        | membrane associated guanylate kinase, WW and PDZ domain containing 2       | PC        | P                |
| <i>Mest</i>      | 6 7.5 cM      | 7q32           | mesoderm specific transcript                                               | PC        | P                |
| <i>Mir296</i>    | 2 AS          | 20q13.32 AS    | microRNA 296                                                               | NC        | P                |
| <i>Mir298</i>    | 2 AS          | 20q13.32 AS    | microRNA 298                                                               | NC        | P                |
| <i>Mkrn3</i>     | 7 29.0 cM AS  | 15q11-q13      | makorin, ring finger protein, 3                                            | PC        | P                |
| <i>Nap1l5</i>    | 6 C1 AS       | 4q22.1 AS      | nucleosome assembly protein 1-like 5                                       | PC        | P                |
| <i>Ndn</i>       | 7 28.0 cM     | 15q11.2-q12 AS | neccdin                                                                    | PC        | P                |
| <i>Nespas</i>    | 2 104.0 cM AS | 20q13.32 AS    | neuroendocrine secretory protein antisense                                 | NC        | P                |
| <i>Nnat</i>      | 2 88.0 cM     | 20q11.2-q12    | neuronatin                                                                 | PC        | P                |
| <i>Ntm</i>       | 9 AS          | 11q25          | neurotrimin                                                                | PC        | M                |

|                 |               |              |                                                                  |    |   |
|-----------------|---------------|--------------|------------------------------------------------------------------|----|---|
| <i>Peg10</i>    | 6 0.5 cM      | 7q21         | paternally expressed 10                                          | PC | P |
| <i>Peg3</i>     | 7 6.5 cM AS   | 19q13.4 AS   | paternally expressed 3                                           | PC | P |
| <i>Phlda2</i>   | 7 69.5 cM AS  | 11p15.5 AS   | pleckstrin homology-like domain, family A, member 2              | PC | M |
| <i>Plagl1</i>   | 10 15.0 cM    | 6q24-q25 AS  | pleiomorphic adenoma gene-like 1                                 | PC | P |
| <i>Ppp1r9a</i>  | 6 0.5 cM      | 7q21.3       | protein phosphatase 1, regulatory (inhibitor) subunit 9A         | PC | M |
| <i>Pwcr1</i>    | 7 29.0 cM AS  | 15q11.2      | Prader-Willi syndrome chromosome region 1                        | NC | P |
| <i>Rian</i>     | 12 60.41 cM   | 14q32.31     | RNA imprinted and accumulated in nucleus                         | NC | M |
| <i>Sgce</i>     | 6 1.0 cM AS   | 7q21-q22 AS  | sarcoglycan, epsilon                                             | PC | P |
| <i>Slc22a18</i> | 7 69.5 cM     | 11p15.5      | solute carrier family 22 (organic cation transporter), member 18 | PC | M |
| <i>Slc22a2</i>  | 17 7.32 cM    | 6q26 AS      | solute carrier family 22 (organic cation transporter), member 2  | PC | M |
| <i>Slc22a3</i>  | 17 7.31 cM AS | 6q26-q27     | solute carrier family 22 (organic cation transporter), member 3  | PC | M |
| <i>Snrpn</i>    | 7 29.0 cM AS  | 15q11.2      | small nuclear ribonucleoprotein N                                | PC | P |
| <i>Snurf</i>    | 7 B5 AS       | 15q12        | SNRPN upstream reading frame                                     | PC | P |
| <i>Tfpi2</i>    | 6 1.0 cM AS   | 7q22 AS      | tissue factor pathway inhibitor 2                                | PC | M |
| <i>Ube3a</i>    | 7 28.65 cM    | 15q11-q13 AS | ubiquitin protein ligase E3A                                     | PC | M |
| <i>Zim2</i>     | 7 A1 AS       | 19q13.4 AS   | zinc finger, imprinted 2                                         | PC | M |

Note: PC, protein coding; NC, non-coding; P, Paternal; M, Maternal; ID, isoform dependent.

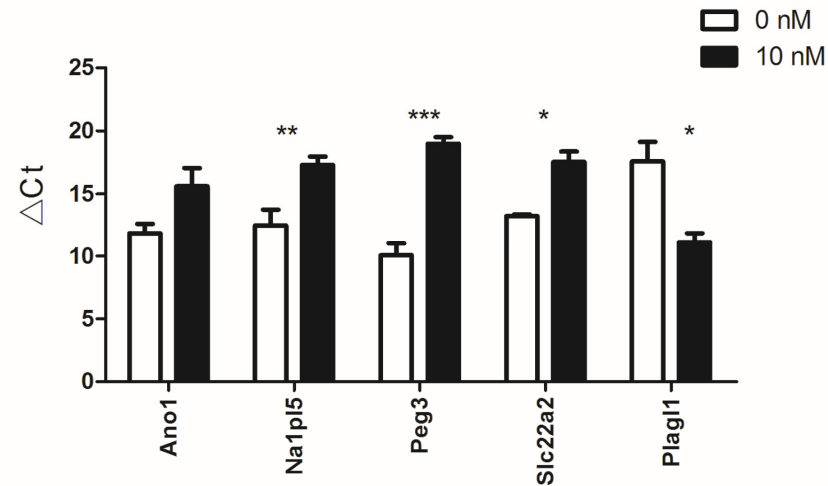

**Figure S1.** Expression profiles of *Ano1*, *Na1pl5*, *Peg3*, *Slc22a2* and *Plagl1*. Data are expressed as the mean  $\pm$  SME. \* $p < 0.05$ ; \*\* $p < 0.01$ ; \*\*\* $p < 0.001$  versus control.

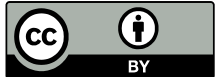

© 2016 by the authors; licensee MDPI, Basel, Switzerland. This article is an open access article distributed under the terms and conditions of the Creative Commons by Attribution (CC-BY) license (<http://creativecommons.org/licenses/by/4.0/>).
